# Supplementary material for: Sugarcane Pulp Take-Out Containers Produce More Microparticles in Acidic Foods
Source: Foods. 2023 Jun 27;12(13):2496. doi: 10.3390/foods12132496 (PMC10340730; doi:10.3390/foods12132496)
Supplement: Supplementary file 1 [file foods-12-02496-s001.zip › foods-2415407-supplementary.pdf]

# **Sugarcane pulp lunch-boxes produce more microparticles in acidic foods**

**Yi Hu<sup>a</sup>, Chunru Mo<sup>b</sup>, Zhiwei Wang<sup>a</sup>, Wenwen Yu<sup>b\*</sup>, Changying Hu<sup>a\*</sup>**

<sup>a</sup> Packaging Engineering Institute, Jinan University, Zhuhai, Guangdong, 519070, China.

<sup>b</sup> Department of Food Science & Engineering, Jinan University, Huangpu West Avenue 601, Guangzhou City, 510632, Guangdong, China.

## **Corresponding authors at:**

*Changying Hu, hucy0000@sina.com*

Address: Packaging Engineering Institute, Jinan University, Zhuhai, Guangdong, 519070, China.

*Wenwen Yu, yuwenwen@jnu.edu.cn*

Address: Department of Food Science & Engineering, Jinan University, Huangpu West Avenue 601, Guangzhou City, 510632, Guangdong, China.

## **Supplementary Information**

Prepared for Submission  
To *Foods*

| Item             | Description                                                                         | Page |
|------------------|-------------------------------------------------------------------------------------|------|
| <b>Figure S1</b> | The leaking phenomenon of lunchbox when contacting with the 95% EtOH food simulant. | S3   |
| <b>Figure S2</b> | Infrared spectra of 15 SCP lunchboxes.                                              | S4   |

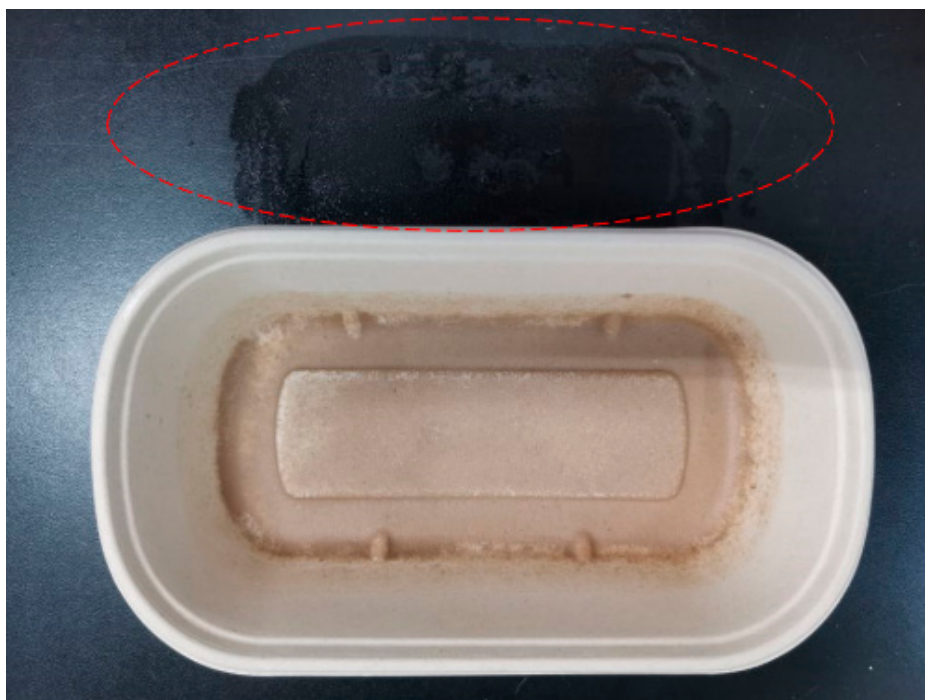

**Figure S1.** The leaking phenomenon of lunchbox when contacting with the 95% EtOH food simulant.

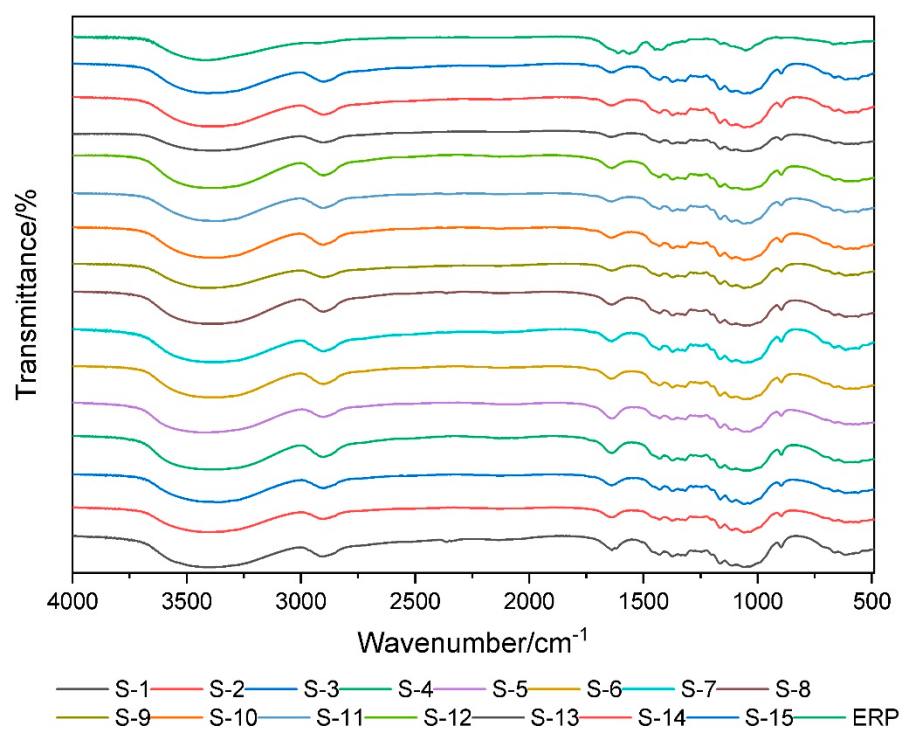

**Figure S2.** Infrared spectra of 15 SCP lunchboxes.
